# Supplementary material for: E-cigarettes and equity: a systematic review of differences in awareness and use between sociodemographic groups
Source: PubMed Central journal article supplement (PMC5739861; doi:10.1136/tobaccocontrol-2016-053222), 2016-12-21
Supplement: tobaccocontrol-2016-053222supp001.pdf [file tobaccocontrol-2016-053222supp001.pdf]

### Supplementary Table: Effect Direction Plot

Ordered by PROGRESS Plus sub-group criteria, and then grouped by evidence quality

Key: ● = outcome reported, statistically significant difference found; ○ = outcome reported, no statistically significant difference found;

○ = outcome reported, no indication of any test for statistical significance; [blank box] = outcome not studied

| Lead Author               | Country                    | Evidence Quality | Sample                             | Aware | Ever use | Current Use | Key findings                                                                                                                                                 |
|---------------------------|----------------------------|------------------|------------------------------------|-------|----------|-------------|--------------------------------------------------------------------------------------------------------------------------------------------------------------|
| <b>PLACE OF RESIDENCE</b> |                            |                  |                                    |       |          |             |                                                                                                                                                              |
| Pepper 2013 (1)           | USA                        | H                | 421 male adolescents               | ○     |          |             |                                                                                                                                                              |
| Adkison 2013 (2)          | UK, USA, Canada, Australia | M                | 5,939 adult smokers                | ●     | ●        | ○           | USA & UK > Australia & Canada (awareness); USA & UK > Canada (ever use); USA > Australia (ever use)                                                          |
| Gallus 2014 (3)           | Italy                      | M                | 3,000 adults                       | ●     | ○        | ●           | Northern Italy & Central Italy > Southern Italy (awareness); Southern Italy > Central Italy (current use)                                                    |
| Giovenco 2014 (4)         | USA                        | M                | 2,136 current/recent smokers       |       | ○        | ○           |                                                                                                                                                              |
| Goniewicz 2012 (5)        | Poland                     | M                | 20,240 high school/uni students    |       | ●        | ●           | Urban > rural                                                                                                                                                |
| King 2014 (6)             | USA                        | M                | 14,758 adults                      | ○     | ○        | ○           |                                                                                                                                                              |
| Lee 2014 (7)              | South Korea                | M                | 75,643 high school students        |       |          | ●           | City & metropolitan city > province                                                                                                                          |
| Tan 2014 (8)              | USA                        | M                | 9,080 adults                       | ○     |          |             |                                                                                                                                                              |
| Vardavas 2014 (9)         | EU member states           | M                | 26,566 adults                      | ●     | ●        |             | Individual countries: various international differences (awareness & ever use); Large towns > rural (ever use); North & East Europe > West Europe (ever use) |
| Agaku 2014 (10)           | EU member states           | L                | Adults in 25 countries             |       |          | ●           | Individual countries: various international differences <sup>a</sup>                                                                                         |
| Agaku 2014 (11)           | USA                        | L                | 60,192 adults                      |       |          | ○           |                                                                                                                                                              |
| Douptcheva 2013 (12)      | Switzerland                | L                | 5,081 men                          |       | ●        |             | German region > French region <sup>b</sup>                                                                                                                   |
| McMillen 2012 (13)        | USA                        | L                | 3,240 adults                       |       | ○        |             |                                                                                                                                                              |
| Pepper 2014 (14)          | USA                        | L                | 17,522 adults                      | ○     |          |             |                                                                                                                                                              |
| Popova 2013 (15)          | USA                        | L                | 7,776 adult current/recent smokers |       | ○        |             |                                                                                                                                                              |
| Regan 2013 (16)           | USA                        | L                | 41,240 adults                      | ○     | ○        | ○           |                                                                                                                                                              |
| <b>RACE / ETHNICITY</b>   |                            |                  |                                    |       |          |             |                                                                                                                                                              |
| Kasza 2013 (17)           | USA                        | H                | 6,110 adult smokers                |       | ○        |             |                                                                                                                                                              |
| Pearson 2012 (18)         | USA                        | H                | 19,026 adult smokers               | ●     | ●        |             | White > African American                                                                                                                                     |
| Pepper 2013 (1)           | USA                        | H                | 421 male adolescents               | ●     |          |             | Other races > Hispanic                                                                                                                                       |
| Adkison 2013 (2)          | UK, USA, Canada, Australia | M                | 5,939 adult smokers                | ●     | ○        | ○           | White/English > Non-white/Non-English <sup>c</sup>                                                                                                           |

| Lead Author               | Country                    | Quality Evidence | Sample                             | Aware | Ever use | Current Use | Key findings                                                                                       |
|---------------------------|----------------------------|------------------|------------------------------------|-------|----------|-------------|----------------------------------------------------------------------------------------------------|
| Amrock 2014 (19)          | USA                        | M                | 24,658 high school students        | ●     | ●        | ●           | White, Mixed/Multiple race > Black (awareness); Hispanic > Asian (ever & current use) <sup>d</sup> |
| Emery 2014 (20)           | USA                        | M                | 17,522 adults                      | ●     |          |             | White > Hispanic, Other                                                                            |
| Giovenco 2014 (4)         | USA                        | M                | 2,136 adult current/recent smokers |       | ●        | ○           | White > Other races (ever use) <sup>e</sup>                                                        |
| King 2014 (6)             | USA                        | M                | 14,758 adults                      | ●     | ○        | ●           | White > Black (awareness); White > Hispanic (current use) <sup>f</sup>                             |
| Lippert 2014 (21)         | USA                        | M                | 15,264 adolescents                 |       | ●        |             | Other races > Black, Mexican-American                                                              |
| Richardson 2014 (22)      | USA                        | M                | 1,487 adult current/former smokers |       | ●        |             | White > Hispanic                                                                                   |
| Tan 2014 (8)              | USA                        | M                | 9,080 adults                       | ●     |          |             | White > Hispanic                                                                                   |
| Agaku 2014 (11)           | USA                        | L                | 60,192 adults                      |       |          | ●           | 'Other, Non-Hispanic', White > Other races <sup>d,g</sup>                                          |
| Camenga 2014 (23)         | Connecticut & NY, USA      | L                | 3,102 high school students         |       |          | ○           |                                                                                                    |
| Camenga 2014 (24)         | Connecticut & NY, USA      | L                | 4,766 high school students         |       |          | ●           | Mixed results                                                                                      |
| Choi 2013 (25)            | Minnesota, USA             | L                | 2,624 adults                       | ○     | ○        |             |                                                                                                    |
| Czoli 2014 (26)           | Canada                     | L                | 1,188 young adults                 |       | ○        | ○           |                                                                                                    |
| Grana 2014 (27)           | USA                        | L                | 1,549 adult smokers                |       |          | ○           |                                                                                                    |
| Hayes 2014 (28)           | USA                        | L                | 2,376 adult smokers                |       |          | ○           |                                                                                                    |
| Hyland 2013 (29)          | New York, USA              | L                | 2 schools                          |       | ○        | ○           |                                                                                                    |
| Li 2013 (30) <sup>h</sup> | New Zealand                | L                | 840 adult current/recent smokers   |       | ○        |             |                                                                                                    |
| McMillen 2012 (13)        | USA                        | L                | 3,240 adults                       |       | ○        |             |                                                                                                    |
| Pokhrel 2014 (31)         | Hawaii, USA                | L                | 307 undergrad students             |       | ●        | ●           | Filipino > White                                                                                   |
| Pokhrel 2013 (32)         | Hawaii, USA                | L                | 1,685 adult smokers                |       | ●        |             | White > Native Hawaiian                                                                            |
| Popova 2013 (15)          | USA                        | L                | 7,776 adult current/recent smokers |       | ●        |             | Asian > White                                                                                      |
| Regan 2013 (16)           | USA                        | L                | 41,240 adults                      | ●     | ○        | ○           | White > African, Hispanic                                                                          |
| Sherratt 2014 (33)        | Liverpool, England         | L                | 256 adult smokers                  |       |          | ○           |                                                                                                    |
| Sutfin 2013 (34)          | North Carolina, USA        | L                | 4,857 undergrad students           |       | ●        |             | Hispanic, Other > White                                                                            |
| Vickerman 2013 (35)       | USA                        | L                | 7,966 adult smokers                |       | ●        |             | White > Other races                                                                                |
| <b>OCCUPATION</b>         |                            |                  |                                    |       |          |             |                                                                                                    |
| EU 2012 (36)              | 27 EU member states        | L                | 26,751 adults                      | ○     |          |             |                                                                                                    |
| <b>GENDER</b>             |                            |                  |                                    |       |          |             |                                                                                                    |
| CHETS 2014 (37)           | Wales                      | H                | 1,601 children                     |       | ○        |             |                                                                                                    |
| Kasza 2013 (17)           | USA                        | H                | 6,110 adult smokers                |       | ○        |             |                                                                                                    |
| Pearson 2012 (18)         | USA                        | H                | 19,026 adult smokers               | ●     |          |             | Men > Women                                                                                        |
| Pepper 2013 (1)           | USA                        | H                | 421 male adolescents               | ○     |          |             |                                                                                                    |
| Adkison 2013 (2)          | UK, USA, Canada, Australia | M                | 5,939 adult smokers                | ●     | ○        | ○           | Men > Women <sup>c</sup>                                                                           |
| Amrock 2014 (19)          | USA                        | M                | 24,658 high school students        | ○     | ●        | ●           | Men > Women <sup>d</sup>                                                                           |
| Emery 2014 (20)           | USA                        | M                | 17,522 adults                      | ●     |          |             | Men > Women                                                                                        |
| Gallus 2014 (3)           | Italy                      | M                | 3,000 adults                       | ●     | ○        | ○           | Men > Women                                                                                        |
| Giovenco 2014 (4)         | USA                        | M                | 2,136 adult current/recent smokers |       | ○        | ○           |                                                                                                    |

| Lead Author                | Country              | Quality Evidence | Sample                             | Aware | Ever use | Current Use | Key findings                                      |
|----------------------------|----------------------|------------------|------------------------------------|-------|----------|-------------|---------------------------------------------------|
| Goniewicz 2012 (5)         | Poland               | M                | 20,240 high school/uni students    |       | ●        | ●           | Males > Females                                   |
| King 2014 (6)              | USA                  | M                | 14,758 adults                      | ○     | ●        | ●           | Women > Men <sup>f</sup>                          |
| Lee 2014 (7)               | South Korea          | M                | 79,202 high school students        |       |          | ●           | Males > Females                                   |
| Lippert 2014 (21)          | USA                  | M                | 15,264 adolescents                 |       | ●        |             | Men > Women                                       |
| Richardson 2014 (22)       | USA                  | M                | 1,487 adult current/former smokers |       | ●        |             | Men > Women                                       |
| Tan 2014 (8)               | USA                  | M                | 9,080 adults                       | ○     |          |             |                                                   |
| Vardavas 2014 (9)          | EU member states     | M                | 26,566 adults                      |       | ○        |             |                                                   |
| Agaku 2014 (11)            | USA                  | L                | 60,192 adults                      |       |          | ●           | Men > Women <sup>d,g</sup>                        |
| Agaku 2014 (10)            | Multiple countries   | L                | Adults in 25 countries             |       |          | ●           | Mixed results in different countries <sup>a</sup> |
| ASH Wales 2014 (38)        | Wales                | L                | 740 adolescents                    | ○     | ○        | ○           |                                                   |
| Biener 2013 (39)           | USA                  | L                | 5,150 adults                       |       | ○        | ○           |                                                   |
| Brown 2014 (40)            | UK                   | L                | 4,117 adult smokers                |       | ○        |             |                                                   |
| Camenga 2014 (23)          | USA                  | L                | 3,102 high school students         |       |          | ○           |                                                   |
| Cho 2011 (41)              | Seoul, South Korea   | L                | 4,341 middle/high school students  |       | ●        |             | Males > Females                                   |
| Choi 2013 (25)             | Minnesota, USA       | L                | 2,624 adults                       | ●     | ●        |             | Men > Women                                       |
| Czoli 2014 (26)            | Canada               | L                | 1,188 young adults                 |       | ○        | ○           |                                                   |
| Dautzenberg 2013 (42)      | Paris, France        | L                | 3,409 high school students         |       | ○        |             |                                                   |
| Dockrell 2013 (43)         | UK                   | L                | 12,432 adults                      |       | ○        | ○           |                                                   |
| EU 2012 (36)               | 27 EU member states  | L                | 26,751 adults                      | ○     |          |             |                                                   |
| Grana 2014 (27)            | USA                  | L                | 1,549 current/recent smokers       |       |          | ●           | Women > Men <sup>i</sup>                          |
| Hyland 2013 (29)           | New York, USA        | L                | 2 schools                          |       | ○        | ○           |                                                   |
| Kinnunen 2013 (44)         | Finland              | L                | 3,535 adolescents                  | ○     | ○        |             |                                                   |
| Kralikova 2013 (45)        | Czech Republic       | L                | 1,738 smokers                      |       | ●        | ●           | Men > Women                                       |
| Krishnan-Sarin 2014 (46)   | Connecticut, USA     | L                | 4,780 middle/high school students  |       | ●        |             | Males > Females                                   |
| Kvaavik 2014 (47)          | Norway               | L                | 629 adult current/former smokers   |       |          | ●           | Men > Women <sup>j</sup>                          |
| Li 2013 (30) <sup>h</sup>  | New Zealand          | L                | 840 adult current/recent smokers   |       | ○        |             |                                                   |
| Martinez-Sanchez 2014 (48) | Barcelona, Spain     | L                | 1,291 adults                       |       | ○        | ○           |                                                   |
| McMillen 2012 (13)         | USA                  | L                | 3,240 adults                       |       | ○        |             |                                                   |
| Pearson 2011 (49)          | USA                  | L                | 3,638 adults                       | ●     | ●        |             | Men > Women                                       |
| Pokhrel 2014 (31)          | Hawaii, USA          | L                | 307 undergrad students             |       | ○        |             |                                                   |
| Pokhrel 2013 (32)          | Hawaii, USA          | L                | 1,685 adult smokers                |       | ○        |             |                                                   |
| Popova 2014 (15)           | USA                  | L                | 7,776 adult current/recent smokers |       | ●        |             | Women > Men                                       |
| Regan 2013 (16)            | USA                  | L                | 41,240 adults                      | ●     | ●        | ○           | Men > Women (aware); Women > Men (ever use)       |
| Sherratt 2014 (33)         | Liverpool, England   | L                | 256 adult smokers                  |       |          | ●           | Females > Men                                     |
| Sochor 2014 (50)           | Brno city, Czech Rep | L                | 966 adults                         |       |          | ●           | Men > Women                                       |
| Stillman 2014 (51)         | USA                  | L                | 723 flight attendants              |       |          | ●           | Men > Women <sup>k</sup>                          |

| Lead Author                 | Country                    | Quality Evidence | Sample                             | Aware | Ever use | Current Use | Key findings                                                                    |
|-----------------------------|----------------------------|------------------|------------------------------------|-------|----------|-------------|---------------------------------------------------------------------------------|
| Sutfin 2013 (34)            | North Carolina, USA        | L                | 4,857 undergrad students           |       | ●        |             | Men > Women                                                                     |
| Vickerman 2013 (35)         | 6 states, USA              | L                | 7,966 adult smokers                |       | ○        |             |                                                                                 |
| WHO 2013 (52)               | Qatar                      | L                | 8,398 adults                       | ○     | ○        | ○           |                                                                                 |
| <b>EDUCATION LEVEL</b>      |                            |                  |                                    |       |          |             |                                                                                 |
| Kasza 2013 (17)             | USA                        | H                | 6,110 adult smokers                |       | ●        |             | Intermediate > lower education                                                  |
| Pearson 2012 (18)           | USA                        | H                | 19,026 adult smokers               |       | ●        |             | Higher > lower education                                                        |
| Pepper 2013 (1)             | USA                        | H                | 421 male adolescents               | ○     |          |             |                                                                                 |
| Gallus 2014 (3)             | Italy                      | M                | 3,000 adults                       | ●     | ●        | ○           | Higher > lower education (aware); Intermediate > lower education (ever use)     |
| Adkison 2013 (2)            | UK, USA, Canada, Australia | M                | 5,939 adult smokers                | ●     | ○        | ●           | Higher > lower education <sup>c</sup>                                           |
| Emery 2014 (20)             | USA                        | M                | 17,522 adults                      | ●     |          |             | Higher > lower education                                                        |
| Giovenco 2014 (4)           | USA                        | M                | 2,136 adult current/recent smokers |       | ○        | ○           |                                                                                 |
| King 2014 (6)               | USA                        | M                | 14,758 adults                      | ○     | ○        | ●           | Less than high school > High school <sup>f</sup>                                |
| Richardson 2014 (22)        | USA                        | M                | 1487 adult current/former smokers  |       | ○        |             |                                                                                 |
| Tan 2014 (8)                | USA                        | M                | 9,080 adults                       | ●     |          |             | Higher > lower education                                                        |
| Agaku 2014 (11)             | USA                        | L                | 60,192 adults                      |       |          | ●           | Lower > higher education <sup>d,g</sup>                                         |
| Choi 2013 (25)              | Minnesota, USA             | L                | 2,624 adults                       | ●     | ○        |             | Higher > lower education                                                        |
| Czoli 2014 (26)             | Canada                     | L                | 1,188 young adults                 |       | ●        | ●           | Lower > higher education (ever use); Higher > lower education (current use)     |
| Douptcheva 2013 (12)        | Switzerland                | L                | 5,081 men                          |       | ●        |             | Secondary > tertiary or primary <sup>b</sup>                                    |
| Grana 2014 (27)             | USA                        | L                | 1,549 smokers                      |       |          | ●           | Lower > higher education                                                        |
| Li 2013 (30) <sup>h</sup>   | New Zealand                | L                | 840 adult current/recent smokers   |       | ○        |             |                                                                                 |
| Martinez-Sanchez 2014 (48)  | Barcelona, Spain           | L                | 1,291 adults                       |       | ○        | ○           |                                                                                 |
| McMillen 2012 (13)          | USA                        | L                | 3,240 adults                       |       | ●        |             | Intermediate > lower education                                                  |
| Pearson 2011 (49)           | USA                        | L                | 3,638 adults                       | ●     | ●        |             | Higher > lower education                                                        |
| Pokhrel 2013 (32)           | Hawaii, USA                | L                | 1,685 adult smokers                |       | ○        |             |                                                                                 |
| Popova 2013 (15)            | USA                        | L                | 7,776 adult current/recent smokers |       | ○        | ●           | Intermediate > higher education                                                 |
| Regan 2013 (16)             | USA                        | L                | 41,240 adults                      | ●     | ●        | ●           | Higher > lower education (aware); Lower > higher education (ever & current use) |
| Sherratt 2014 (33)          | Liverpool, England         | L                | 256 adult smokers                  |       |          | ○           |                                                                                 |
| Sochor 2014 (50)            | Brno city, Czech Republic  | L                | 966 adults                         |       |          | ○           |                                                                                 |
| Stillman 2014 (51)          | USA                        | L                | 723 flight attendants              |       |          | ○           |                                                                                 |
| Vickerman 2013 (35)         | USA                        | L                | 7,966 adult smokers                |       | ●        |             | Higher > lower education                                                        |
| <b>SOCIOECONOMIC STATUS</b> |                            |                  |                                    |       |          |             |                                                                                 |
| CHETS 2014 (37)             | Wales                      | H                | 1,601 children                     |       | ○        |             |                                                                                 |
| Kasza 2013 (17)             | USA                        | H                | 6,110 adult smokers                |       | ○        |             |                                                                                 |
| Adkison 2013 (2)            | UK, USA, Canada, Australia | M                | 5,939 adult smokers                | ●     | ●        | ○           | Higher > lower income <sup>c</sup>                                              |
| Emery 2014 (20)             | USA                        | M                | 17,522 adults                      | ○     |          |             |                                                                                 |
| Lippert 2014 (21)           | USA                        | M                | 15,264 adolescents                 |       | ○        |             |                                                                                 |
| Lee 2014 (7)                | South Korea                | M                | 79,202 high school students        |       |          | ●           | Higher > lower weekly allowance                                                 |

| Lead Author                        | Country                    | Quality Evidence | Sample                                 | Aware | Ever use | Current Use | Key findings                                                         |
|------------------------------------|----------------------------|------------------|----------------------------------------|-------|----------|-------------|----------------------------------------------------------------------|
| Richardson 2014 (22)               | USA                        | M                | 1,487 adult current/former smokers     |       | ○        |             |                                                                      |
| Tan 2014 (8)                       | USA                        | M                | 9,080 adults                           | ○     |          |             |                                                                      |
| Vardavas 2014 (9)                  | EU member states           | M                | 26,566 adults                          |       | ○        |             |                                                                      |
| Agaku 2014 (11)                    | USA                        | L                | 60,192 adults                          |       |          | ●           | Lower > higher income <sup>d,g</sup>                                 |
| Brown 2014 (40)                    | UK                         | L                | 4,117 adult smokers                    |       | ●        |             | Higher > lower SES <sup>i</sup>                                      |
| Dockrell 2013 (43)                 | UK                         | L                | 12,432 adults                          |       | ○        | ○           |                                                                      |
| Douptcheva 2013 (12) <sup>b</sup>  | Switzerland                | L                | 5,081 men                              |       | ○        |             |                                                                      |
| King 2013 (53)                     | USA                        | L                | 10,739 adults                          | ○     | ○        |             |                                                                      |
| Kinnunen 2013 (44)                 | Finland                    | L                | 3,535 adolescents                      |       | ●        |             | Mixed results                                                        |
| Li 2013 (30)                       | New Zealand                | L                | 840 adult current/recent smokers       |       | ●        |             | Higher > lower income <sup>h</sup>                                   |
| Pokhrel 2014 (31)                  | Hawaii, USA                | L                | 307 adult current/former/never smokers |       | ○        |             |                                                                      |
| Pokhrel 2013 (32)                  | Hawaii, USA                | L                | 1,685 adult smokers                    |       | ○        |             |                                                                      |
| Popova 2013 (15)                   | USA                        | L                | 7,776 adult current/recent smokers     |       | ○        | ●           | Lower > higher income                                                |
| Regan 2013 (16)                    | USA                        | L                | 41,240 adults                          | ○     | ●        | ○           | Mixed results                                                        |
| Sochor 2014 (50)                   | Brno city, Czech Republic  | L                | 966 adults                             |       |          | ○           |                                                                      |
| Sutfin 2013 (34)                   | North Carolina, USA        | L                | 4,857 undergrad students               |       | ○        |             |                                                                      |
| Vickerman 2013 (35)                | USA                        | L                | 7,966 adult smokers                    |       | ●        |             | Mixed results                                                        |
| <b>DISABILITY OR HEALTH STATUS</b> |                            |                  |                                        |       |          |             |                                                                      |
| Pearson 2012 (18)                  | USA                        | H                | 19,026 adult smokers                   |       | ●        |             | Better > worse self-reported health status                           |
| Richardson 2014 (22)               | USA                        | M                | 1,487 adult current/former smokers     |       | ○        |             |                                                                      |
| Tan 2014 (8)                       | USA                        | M                | 9,080 adults                           | ○     |          |             |                                                                      |
| Hayes 2014 (28)                    | USA                        | L                | 2,376 adult smokers                    |       |          | ●           | Medical illnesses, depressed mood, alcohol use > absence of these    |
| <b>SEXUAL ORIENTATION</b>          |                            |                  |                                        |       |          |             |                                                                      |
| Emery 2014 (20)                    | USA                        | M                | 17,522 adults                          | ○     |          |             |                                                                      |
| Agaku 2014 (11)                    | USA                        | L                | 60,192 adults                          |       |          | ●           | Lesbian, gay or bisexual > heterosexual & unspecified <sup>d,g</sup> |
| <b>AGE</b>                         |                            |                  |                                        |       |          |             |                                                                      |
| Kasza 2013 (17)                    | USA                        | H                | 6,110 adult smokers                    |       | ●        |             | 18-24yo > 40yo+                                                      |
| Pearson 2012 (18)                  | USA                        | H                | 19,026 adult smokers                   | ●     | ●        |             | Younger > Older adults                                               |
| Pepper 2013 (1)                    | USA                        | H                | 421 male adolescents                   | ●     |          |             | Older > Younger children                                             |
| Adkison 2013 (2)                   | UK, USA, Canada, Australia | M                | 5,939 adult smokers                    | ●     | ●        | ○           | Younger > Older adults <sup>c</sup>                                  |
| Amrock 2014 (19)                   | USA                        | M                | 24,658 high school students            | ●     | ●        | ●           | Older > Younger children <sup>d</sup>                                |
| King 2014 (6)                      | USA                        | M                | 14,758 adults                          | ○     | ●        | ○           | Younger > Older adults <sup>f</sup>                                  |
| Gallus 2014 (3)                    | Italy                      | M                | 3,000 adults                           | ●     | ●        | ●           | Younger > Older adults                                               |
| Giovenco 2014 (4)                  | USA                        | M                | 2,136 adult current/recent smokers     |       | ●        | ○           | Younger > Older adults                                               |
| Goniewicz 2012 (5)                 | Poland                     | M                | 20,240 high school/uni students        |       | ●        | ●           | High school students > Uni students                                  |
| Lee 2014 (7)                       | Korea                      | M                | 79,202 high school students            |       | ○        | ●           | Older > Younger children                                             |

| Lead Author                       | Country                   | Quality Evidence | Sample                             | Aware | Ever use | Current Use | Key findings                                                            |
|-----------------------------------|---------------------------|------------------|------------------------------------|-------|----------|-------------|-------------------------------------------------------------------------|
| Lippert 2014 (21)                 | USA                       | M                | 15,264 adolescents                 |       | ○        |             |                                                                         |
| Richardson 2014 (22)              | USA                       | M                | 1,487 adult current/former smokers |       | ●        |             | Younger > Older adults                                                  |
| Tan 2014 (8)                      | USA                       | M                | 9,080 adults                       | ●     |          |             | Younger > Older adults                                                  |
| Vardavas 2014 (9)                 | EU member states          | M                | 26,566 adults                      |       | ●        |             | Younger > Older adults                                                  |
| Agaku 2014 (11)                   | USA                       | L                | 60,192 adults                      |       |          | ●           | Younger > Older adults <sup>ds</sup>                                    |
| ASH 2014 (54)                     | Great Britain             | L                | 53,719 adults & children           | ○     | ○        | ○           |                                                                         |
| ASH Wales 2014 (38)               | Wales                     | L                | 740 adolescents                    | ○     | ○        | ○           |                                                                         |
| Baeza-Loya 2014 (55)              | USA                       | L                | 184 adults                         |       | ○        |             |                                                                         |
| Biener 2014 (39)                  | USA                       | L                | 5,150 adults                       |       |          | ○           |                                                                         |
| Brown 2014 (40)                   | UK                        | L                | 4,117 adult smokers                |       | ○        |             |                                                                         |
| Cho 2011 (41)                     | Seoul & province in Korea | L                | 4,341 middle/high school students  |       | ○        |             |                                                                         |
| Choi 2013 (25)                    | Minnesota, USA            | L                | 2,624 adults                       | ○     | ●        |             | 20-24year olds > 25-28year olds                                         |
| Czoli 2014 (26)                   | Canada                    | L                | 1,188 young adults                 |       | ○        | ○           |                                                                         |
| Dautzenberg 2013 (42)             | Paris, France             | L                | 3,409 high school students         |       | ○        |             |                                                                         |
| Dockrell 2013 (56)                | UK                        | L                | 12,171 adolescents                 | ○     | ○        | ○           |                                                                         |
| Dockrell 2013 (43)                | UK                        | L                | 12,432 adults                      |       | ●        |             | Younger > Older adults                                                  |
| Douptcheva 2013 (12) <sup>b</sup> | Switzerland               | L                | 5,081 men                          |       | ○        |             |                                                                         |
| EU 2012 (36)                      | 27 EU member states       | L                | 26,751 adults                      | ○     |          |             |                                                                         |
| Grana 2014 (27)                   | USA                       | L                | 1,549 adult smokers                |       |          | ●           | Younger > Older adults                                                  |
| Johns 2014 (57)                   | USA                       | L                | 504 adolescents                    |       | ●        |             | Older > Younger children                                                |
| King 2013 (53)                    | USA                       | L                | 10,739 adults                      | ●     | ○        |             | Younger > Older adults                                                  |
| Kinnunen 2013 (44)                | Finland                   | L                | 3,535 adolescents                  | ○     | ○        |             |                                                                         |
| Kralikova 2013 (45)               | Czech Republic            | L                | 1,738 smokers                      |       | ●        | ●           | Younger > Older adults (ever use); Older > Younger adults (current use) |
| Krishnan-Sarin 2014 (46)          | USA                       | L                | 4,780 middle/high school students  | ○     | ○        | ○           |                                                                         |
| Li 2013 (30)                      | New Zealand               | L                | 840 adult current/recent smokers   |       | ●        |             | Younger > Older adults <sup>h</sup>                                     |
| Martinez-Sanchez 2014 (48)        | Barcelona, Spain          | L                | 1,291 adults                       |       | ●        | ○           | Younger > Older adults                                                  |
| McMillen 2012 (13)                | USA                       | L                | 3,240 adults                       |       | ○        |             |                                                                         |
| Pepper 2014 (14)                  | USA                       | L                | 17,522 adults                      | ●     |          |             | Younger > Older adults                                                  |
| Pokhrel 2014 (31)                 | Hawaii, USA               | L                | 307 undergrad students             |       | ●        | ●           | Younger > Older adults                                                  |
| Pokhrel 2013 (32)                 | Hawaii, USA               | L                | 1,685 adult smokers                |       | ●        |             | Younger > Older adults                                                  |
| Popova 2013 (15)                  | USA                       | L                | 7,776 adult current/recent smokers |       | ●        |             | Younger > Older adults                                                  |
| Regan 2013 (16)                   | USA                       | L                | 41,240 adults                      | ●     | ○        | ○           | Younger > Older adults                                                  |
| Sherratt 2014 (33)                | Liverpool, England        | L                | 256 adult smokers                  |       |          | ○           |                                                                         |
| Sochor 2014 (50)                  | Brno city, Czech Republic | L                | 966 adults                         |       |          | ●           | Older > Younger adults                                                  |
| Stillman 2014 (51)                | USA                       | L                | 723 flight attendants              |       |          | ○           |                                                                         |
| Sutfin 2013 (34)                  | North Carolina, USA       | L                | 4,857 undergrad students           |       | ○        |             |                                                                         |

| Lead Author         | Country       | Quality Evidence | Sample                                      | Aware | Ever use | Current Use | Key findings |
|---------------------|---------------|------------------|---------------------------------------------|-------|----------|-------------|--------------|
| Vickerman 2013 (35) | 6 states, USA | L                | 7,966 adult smokers                         |       | ○        |             |              |
| Yong 2014 (58)      | Australia     | L                | ~13,500 current/former smokers <sup>l</sup> | ○     | ○        |             |              |

<sup>a</sup> Current use defined as self-reported use 'regularly' or 'occasionally'.

<sup>b</sup> Among smokers only. Ever use defined as any use in last 12 months.

<sup>c</sup> Plot shows results for all 4 countries combined.

<sup>d</sup> Statistical significance inferred by review authors from non-overlapping confidence intervals

<sup>e</sup> Rates also higher among whites for 'established use' (used an e-cigarette at least once in the past 30 days and more than 50 times in their lifetime).

<sup>f</sup> Study reports multiple years of data; for reporting purposes, plot reflects data from most recent year.

<sup>g</sup> Current use defined as reporting smoking electronic cigarettes at least once during their lifetime and now smoking them 'every day' or 'some days'.

<sup>h</sup> Ever purchase of an e-cigarette taken as proxy for ever use.

<sup>i</sup> Among smokers only.

<sup>j</sup> Among both current and former smokers respectively.

<sup>k</sup> Current use defined as 'do you use e-cigarettes?' (i.e. no 30-day timeframe given).

<sup>l</sup> Estimated by review team due to sample size not being reported directly by authors.

1. Pepper JK, Reiter PL, McRee A-L, et al. Adolescent Males' Awareness of and Willingness to Try Electronic Cigarettes. *Journal of Adolescent Health*. 2013;52(2):144-50.
2. Adkison SE, O'Connor RJ, Bansal-Travers M, et al. Electronic nicotine delivery systems: international tobacco control four-country survey. *American journal of preventive medicine*. 2013;44(3):207-15.
3. Gallus S, Lugo A, Pacifici R, et al. E-Cigarette Awareness, Use, and Harm Perception in Italy: A National Representative Survey. *Nicotine Tob Res*. 2014;16(12):1541–1548.
4. Giovenco DP, Lewis MJ, Delnevo CD. Factors Associated with E-cigarette Use: A National Population Survey of Current and Former Smokers. *Am J Prev Med*. 2014;47(4):476-80.
5. Goniewicz ML, Zielinska-Danch W. Electronic Cigarette Use Among Teenagers and Young Adults in Poland. *Pediatrics*. 2012;130(4):E879-E885.
6. King BA, Patel R, Nguyen K, et al. Trends in Awareness and Use of Electronic Cigarettes among U.S. Adults, 2010-2013. *Nicotine Tob Res*. 2014;17,219-227.
7. Lee S, Grana RA, Glantz SA. Electronic cigarette use among Korean adolescents: a cross-sectional study of market penetration, dual use, and relationship to quit attempts and former smoking. *J Adolesc Health*. 2014;54(6):684-90.
8. Tan ASL, Bigman CA. E-Cigarette Awareness and Perceived Harmfulness Prevalence and Associations with Smoking-Cessation Outcomes. *American Journal of Preventive Medicine*. 2014;47(2):141-9.



9. Vardavas CI, Filippidis FT. Determinants and prevalence of e-cigarette use throughout the European Union: a secondary analysis of 26 566 youth and adults from 27 Countries. *Tob Control* 2015;24:442-8.
10. Agaku IT, Filippidis FT, Vardavas CI, et al. Poly-tobacco use among adults in 44 countries during 2008-2012: Evidence for an integrative and comprehensive approach in tobacco control. *Drug Alcohol Depend*. 2014 Jun 1;139:60-70.
11. Agaku IT, King BA, Husten CG, et al. Tobacco product use among adults--United States, 2012-2013. *MMWR Morb Mortal Wkly Rep*. 2014 Jun 27;63(25):542-7.
12. Douptcheva N, Gmel G, Studer J, et al. Use of electronic cigarettes among young Swiss men. *J Epidemiol Community Health*. 2013;67(12):1075-6.
13. McMillen R, Maduka J, Winickoff J. Use of emerging tobacco products in the United States. *Journal of environmental and public health*. 2012;2012:989474.
14. Pepper JK, Emery SL, Ribisl KM, et al. Hows U.S. adults find out about electronic cigarettes: implications for public health messages. *Nicotine Tob Res*. 2014;16(8):1140-4.
15. Popova L, Ling PM. Alternative tobacco product use and smoking cessation: a national study. *American journal of public health*. 2013;103(5):923-30.
16. Regan AK, Promoff G, Dube SR, et al. Electronic nicotine delivery systems: adult use and awareness of the 'e-cigarette' in the USA. *Tob Control*. 2013;22(1):19-23.

17. Kasza KA, Bansal-Travers M, O'Connor RJ, et al. Cigarette smokers' use of unconventional Tobacco products and associations with quitting activity: Findings from the ITC-4 U.S. cohort. *Nicotine Tob Res.* 2014;16(6):672–681.
18. Pearson JL, Richardson A, Niaura RS, et al. e-Cigarette awareness, use, and harm perceptions in US adults. *American journal of public health.* 2012;102(9):1758-66.
19. Amrock SM, Zakhar J, Zhou S, et al. Perception of E-cigarettes' Harm and Its Correlation With Use Among U.S. Adolescents. *Nicotine Tob Res.* 2015 Mar;17(3):330-6.
20. Emery SL, Vera L, Huang J, et al. Wanna know about vaping? Patterns of message exposure, seeking and sharing information about e-cigarettes across media platforms. *Tobacco Control.* 2014;23:17-25.
21. Lippert AM. Do Adolescent Smokers Use E-Cigarettes to Help Them Quit? The Sociodemographic Correlates and Cessation Motivations of U.S. Adolescent E-Cigarette Use. *Am J Health Promot.* 2015 Jul-Aug;29(6):374-9.
22. Richardson A, Pearson J, Haijun X, et al. Prevalence, Harm Perceptions, and Reasons for Using Noncombustible Tobacco Products Among Current and Former Smokers. *American Journal of Public Health.* 2014;104(8):1437-44.
23. Camenga DR, Kong G, Cavallo DA, et al. Alternate tobacco product and drug use among adolescents who use electronic cigarettes, cigarettes only, and never smokers. *J Adolesc Health.* 2014;55(4):588-91.
24. Camenga DR, Delmerico J, Kong G, et al. Trends in use of electronic nicotine delivery systems by adolescents. *Addict Behav.* 2014;39(1):338-40.

25. Choi K, Forster J. Characteristics associated with awareness, perceptions, and use of electronic nicotine delivery systems among young US Midwestern adults. *American journal of public health*. 2013;103(3):556-61.
26. Czoli CD, Hammond D, White CM. Electronic cigarettes in Canada: Prevalence of use and perceptions among youth and young adults. *Canadian Journal of Public Health*. 2014;105(2):e97-e102.
27. Grana RA, Popova L, Ling PM. A longitudinal analysis of electronic cigarette use and smoking cessation. *JAMA Intern Med*. 2014;174(5):812-3.
28. Hayes RB, Scheuermann TS, Resnicow K, et al. POS3-160 Smoking and quitting history characteristics among current electronic cigarette users in a national multi-ethnic adult smoker sample. In: SNRT. *Proceedings of the 20<sup>th</sup> annual meeting of the Society for Nicotine and Tobacco Research; 2014 Feb 5-8; Seattle, USA*.
29. Hyland A, Delmerico J, Cummings M, et al. PA10-4 Use of electronic nicotine delivery systems by teenagers in a longitudinal study In: SNRT. *Proceedings of the 19<sup>th</sup> annual meeting of the Society for Nicotine and Tobacco Research; 2013 March 13-16; Boston, USA*.
30. Li J, Bullen C, Newcombe R, et al. The use and acceptability of electronic cigarettes among New Zealand smokers. *N Z Med J*. 2013 May 31;126(1375):48-57.
31. Pokhrel P, Little MA, Fagan P, et al. Electronic cigarette use outcome expectancies among college students. *Addict Behav*. 2014;39(6):1062-5.

32. Pokhrel P, Fagan P, Little MA, et al. Smokers who try e-cigarettes to quit smoking: findings from a multiethnic study in Hawaii. *American journal of public health*. 2013;103(9):e57-62.
33. Sherratt FC, Robinson J, Marcus M, et al. E-cigarette usage within a local stop smoking service. Presentation at: *UK National Smoking Cessation Conference; 2014 June 12-13; London, UK*. [www.uknsc.org/uknsc2014\\_presentation\\_319.php](http://www.uknsc.org/uknsc2014_presentation_319.php)
34. Sutfin EL, McCoy TP, Morrell HER, et al. Electronic cigarette use by college students. *Drug and Alcohol Dependence*. 2013;131(3):214-21.
35. Vickerman KA, Carpenter KM, Altman T, et al. Use of Electronic Cigarettes Among State Tobacco Cessation Quitline Callers. *Nicotine Tob Res*. 2013;15(10):1787-93.
36. European Commission. *Attitudes of Europeans towards tobacco*. EC, 2012. [http://ec.europa.eu/health/tobacco/docs/eurobaro\\_attitudes\\_towards\\_tobacco\\_2012\\_en.pdf](http://ec.europa.eu/health/tobacco/docs/eurobaro_attitudes_towards_tobacco_2012_en.pdf)
37. Welsh Government. *Exposure to secondhand smoke in cars and e-cigarette use among 10-11 year old children in Wales: CHETS Wales 2 key findings report*, Welsh Government Social Research 71/2014, 2014. <http://dera.ioe.ac.uk/20494/1/140715-exposure-secondhand-smoke-cars-ecigarette-use-among-10-11-year-olds-chets-2-en.pdf>
38. ASH Wales. *Young people and the use of e-cigarettes in Wales*. ASH Wales, 2014. [http://ashwales.org.uk/assets/factsheets-leaflets/young\\_people\\_and\\_e-cigarettes\\_in\\_wales\\_final\\_march\\_2014.pdf](http://ashwales.org.uk/assets/factsheets-leaflets/young_people_and_e-cigarettes_in_wales_final_march_2014.pdf)

39. Biener L, McInerney S. POS4-41 Broad appeal of electronic cigarettes in the smoker population contrasts with relatively low appeal of snus. In: SNRT. *Proceedings of the 19<sup>th</sup> annual meeting of the Society for Nicotine and Tobacco Research; 2013 March 13-16; Boston, USA.*
40. Brown J, West R, Beard E, et al. Prevalence and characteristics of e-cigarette users in Great Britain: Findings from a general population survey of smokers. *Addictive Behaviors.* 2014;39(6):1120-5.
41. Cho JH, Shin E, Moon S-S. Electronic-Cigarette Smoking Experience Among Adolescents. *Journal of Adolescent Health.* 2011;49(5):542-6.
42. Dautzenberg B, Birkui P, Noël M. E-cigarette: a new tobacco product for schoolchildren in Paris. *Open J Respiratory Diseases.* 2013;3:21-4.
43. Dockrell M, Morrison R, Bauld L, et al. E-cigarettes: prevalence and attitudes in Great Britain. *Nicotine Tob Res.* 2013;15(10):1737-44.
44. Kinnunen JM, Ollila H, El-Amin SE, et al. Awareness and determinants of electronic cigarette use among Finnish adolescents in 2013: a population-based study. *Tob Control.* 2015;24:e264-70.
45. Kralikova E, Novak J, West O, et al. Do e-cigarettes have the potential to compete with conventional cigarettes?: A survey of conventional cigarette smokers' experiences with e-cigarettes. *Chest.* 2013 Nov;144(5):1609-14.

46. Krishnan-Sarin S. E-cigarettes and flavors: Perceptions and use among adolescents and young adults. In: SNRT. *Proceedings of the Society for Nicotine and Tobacco Research Europe Annual Meeting; 2014 Sep 18-20; Barcelona, Spain.*
47. Kvaavik E, Lund M. O-55. Use of e-cigarettes and smokeless tobacco as smoking cessation aids – do they differ by gender? In: SNRT. *Proceedings of the Society for Nicotine and Tobacco Research Europe Annual Meeting; 2014 Sep 18-20; Barcelona, Spain.*
48. Martinez-Sanchez JM, Ballbe M, Fu M, et al. Electronic cigarette use among adult population: a cross-sectional study in Barcelona, Spain (2013-2014). *BMJ Open.* 2014;4(8).
49. Pearson J, Richardson A, Niauras R, et al. POS5-96 E-cigarette awareness, use and risk perceptions among current and former smokers. In: SNRT. *Proceedings of the 17<sup>th</sup> annual meeting of the Society for Nicotine and Tobacco Research; 2011 Feb 16-19; Toronto, Canada.*
50. Sochor O, Kralikova E, Cifkova R, et al. Tobacco use and some characteristics of tobacco users. Preliminary results of "Kardiovize Brno 2030". *Cor et Vasa.* 2014;56(2).
51. Stillman FA, Soong A, Zheng LY, et al. E-cigarette use in air transit: self-reported data from US flight attendants. *Tob Control* 2014. Published Online First: 20 Jun 2014. doi:10.1136/tobaccocontrol-2013-051514
52. World Health Organisation. *Global adult tobacco survey: Qatar factsheet.* WHO, 2013.  
[http://www.emro.who.int/images/stories/tfi/documents/FACT\\_SHEETS/FS\\_GATS\\_Qatar\\_2013.pdf?ua=1](http://www.emro.who.int/images/stories/tfi/documents/FACT_SHEETS/FS_GATS_Qatar_2013.pdf?ua=1)

53. King BA, Alam S, Promoff G, et al. Awareness and Ever-Use of Electronic Cigarettes Among U.S. Adults, 2010-2011. *Nicotine & Tobacco Research*. 2013;15(9):1623-7.
54. Action on Smoking and Health. Factsheet: Use of e-cigarettes continues to rise among British adult smokers but use among young people is negligible. ASH, 2013. [www.ash.org.uk/media-room/press-releases/:use-of-e-cigarettes-continues-to-rise-among-british-adult-smokers-but-use-among-young-people-is-negligible](http://www.ash.org.uk/media-room/press-releases/:use-of-e-cigarettes-continues-to-rise-among-british-adult-smokers-but-use-among-young-people-is-negligible)
55. Baeza-Loya S, Viswanath H, Carter A, et al. Perceptions about e-cigarette safety may lead to e-smoking during pregnancy. *Bull Menninger Clin*. 2014;78(3):243-52.
56. Dockrell M. E-cigarettes and shisha: Gateways to regular smoking among British youth. Presentation at: *UK National Smoking Cessation Conference; 2014 June 27-28; London, UK*. [www.uknsc.org/uknsc2013\\_presentation\\_261.php](http://www.uknsc.org/uknsc2013_presentation_261.php)
57. Johns M, Shelley D, Farley SM, editors. POS4-18 Predictors of electronic cigarette use among a sample of new york city adolescents. In: SNRT. *Proceedings of the 20<sup>th</sup> annual meeting of the Society for Nicotine and Tobacco Research; 2014 Feb 5-8; Seattle, USA*.
58. Yong H, Borland R, Balmford J, et al. POS4-46 Changes in e-cigarette awareness, trial, use and relative harm beliefs among current and former smokers in four high-income countries. In: SNRT. *Proceedings of the 20<sup>th</sup> annual meeting of the Society for Nicotine and Tobacco Research; 2014 Feb 5-8; Seattle, USA*.
